# Supplementary material
Source: PubMed Central journal article supplement (PMC4313839)
Supplement: pnas.201424288SI.pdf [file pnas.201424288SI.pdf]

# Supporting Information

Yang et al. 10.1073/pnas.1424288112

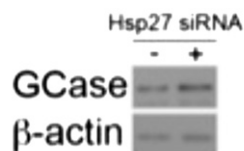

Fig. S1. Western blot showed GCase quantity increased in fibroblasts derived from a GD patient (HS1053) after depleting Hsp27 through siRNA transfection for 2 d.

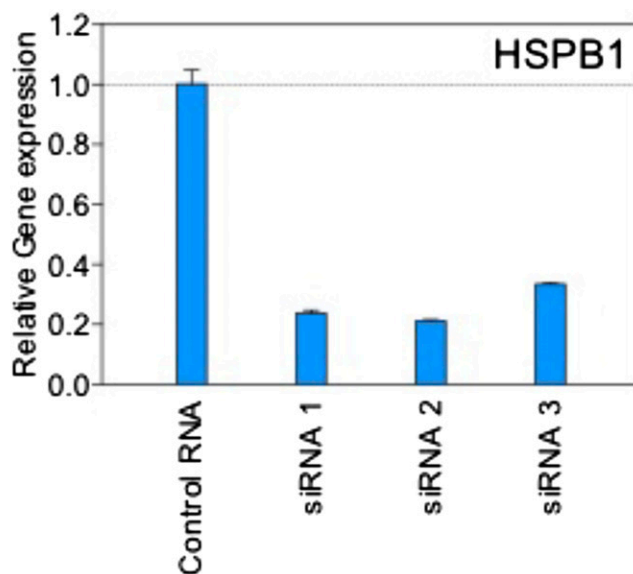

Fig. S2. Quantitative real-time PCR showed successful inhibition by the predesigned siRNA of Hsp27 (HSPB1) expression.

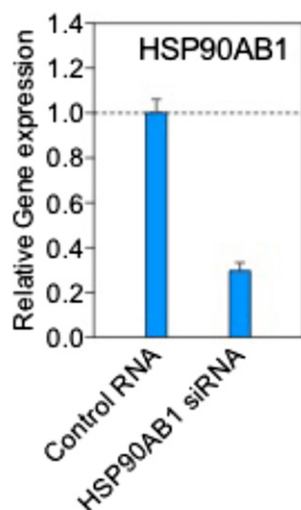

Fig. S3. Quantitative real-time PCR showed successful inhibition by the predesigned siRNA of Hsp90 expression.

**Table S1. Small interfering RNA sequence for Hsp27**

| Name     | Sense                     | Antisense                   |
|----------|---------------------------|-----------------------------|
| iHsp27.1 | GGUGCUUCACGCGAAAUACACGCT  | AGCGUGUAUUUCCGCGUGAAGCACCGG |
| iHsp27.2 | AGCUAGCCACGCAGUCCAACGAGAT | AUCUCGUUGGACUGCGUGGCUAGCUUG |
| iHsp27.3 | GGAGCGGCAGGACGAGCAUGGCUAC | GUAGCCAUGCUCGUCCUGCCGCUCCUC |
